# Supplementary material for: A dual stimuli responsive natural polymer based superabsorbent hydrogel engineered through a novel cross-linker
Source: Royal Society of Chemistry journal article supplement (doi:10.1039/d0py01729a), 2021-01-01
Supplement: d0py01729a1.pdf [file d0py01729a1.pdf]

## Supplementary Information

### Dual Stimuli Responsive Natural Polymer Based Superabsorbent Hydrogel Engineered Through a Novel Cross-linker

Saloni Mehra<sup>a,b</sup>, Safiya Nisar<sup>a</sup>, Sonal Chauhan<sup>a</sup>, Gurmeet Singh<sup>c</sup>, Virender Singh<sup>d</sup> and Sunita Rattan<sup>\*a</sup>

*a. Amity Institute of Applied Sciences, Amity University Uttar Pradesh, Sector-125, Noida 201303, India.*

*b. Jubilant Biosys Limited, B-34 Sector-58, Noida 201301, India*

*c. Light Stock Processing Division, CSIR-Indian Institute of Petroleum, Dehradun, India.*

*d. Department of Chemistry, Central University of Punjab, Bathinda, Punjab, 151001, India.*

#### Table of Contents

1. Figure S1 (a): <sup>1</sup>H-NMR spectrum of methyl 2-azido-4-bromobenzoate (2)
2. Figure S1 (b): HRMS spectrum of methyl 2-azido-4-bromobenzoate (2)
3. Figure S2 (a): <sup>1</sup>H-NMR spectrum of tert-butyl(1-(2-(methoxycarbonyl)-5-bromophenyl)-1H-1,2,3-triazol-4-yl)methylcarbamate (3)
4. Figure S2 (b): HRMS spectrum of tert-butyl(1-(2-(methoxycarbonyl)-5-bromophenyl)-1H-1,2,3-triazol-4-yl)methylcarbamate (3)
5. Figure S3 (a): <sup>1</sup>H-NMR spectrum of tert-butyl (1-(2-(methoxycarbonyl)-5-vinylphenyl)-1H-1,2,3-triazol-4-yl)methylcarbamate (4)
6. Figure S3 (b): HRMS spectrum of tert-butyl (1-(2-(methoxycarbonyl)-5-vinylphenyl)-1H-1,2,3-triazol-4-yl)methylcarbamate (4)
7. Figure S4 (a): <sup>1</sup>H-NMR spectrum of methyl 2-(4-(aminomethyl)-1H-1,2,3-triazol-1-yl)-4-vinylbenzoate (5)
8. Figure S4 (b): HRMS spectrum of methyl 2-(4-(aminomethyl)-1H-1,2,3-triazol-1-yl)-4-vinylbenzoate (5)
9. Figure S5 (a): <sup>1</sup>H-NMR spectrum of methyl 2-(4-((acrylamido)methyl)-1H-1,2,3-triazol-1-yl)-4-vinylbenzoate (6)
10. Figure S5 (b): HRMS spectrum of methyl 2-(4-((acrylamido)methyl)-1H-1,2,3-triazol-1-yl)-4-vinylbenzoate (6)
11. Figure S6 (a): <sup>1</sup>H-NMR spectrum of 2-(4-((Acrylamido)methyl)-1H-1,2,3-triazol-1-yl)-4-vinylbenzoic acid (7)

12. Figure S6 (b): HRMS spectrum of 2-(4-((Acrylamido)methyl)-1H-1,2,3-triazol-1-yl)-4-vinylbenzoic acid (7)
13. Figure S7(a): HRMS spectrum of Neat SPI
14. Figure S8(a):  $^1\text{H-NMR}$  spectrum of Grafted SPI with novel monomer.
15. Figure S8(b): HRMS spectrum of Grafted SPI with novel monomer.

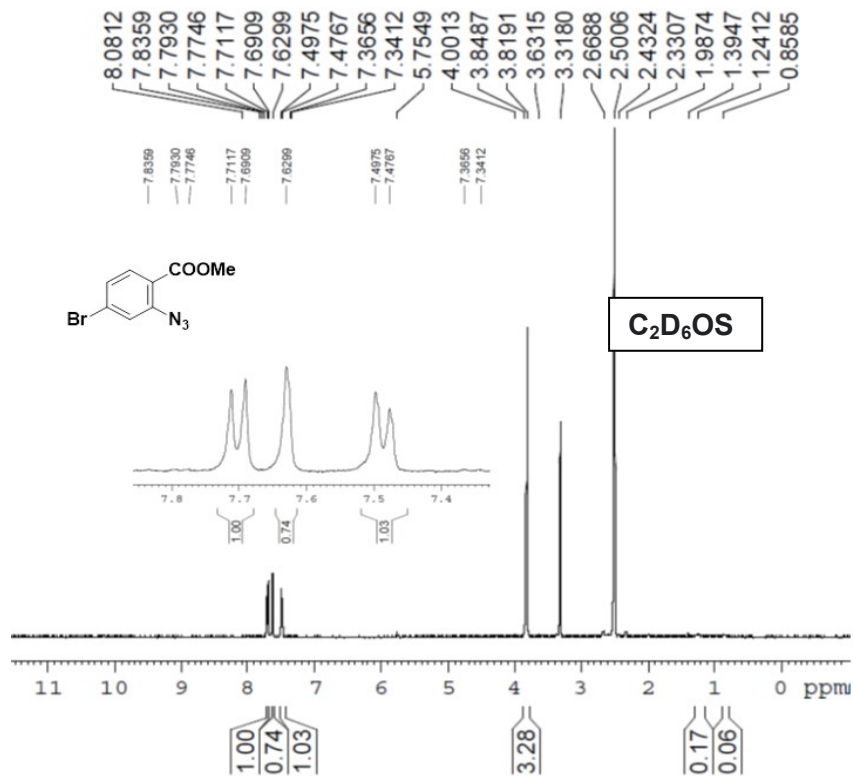

Figure S1 (a):  $^1\text{H}$  NMR spectrum of methyl 2-azido-4-bromobenzoate (2)

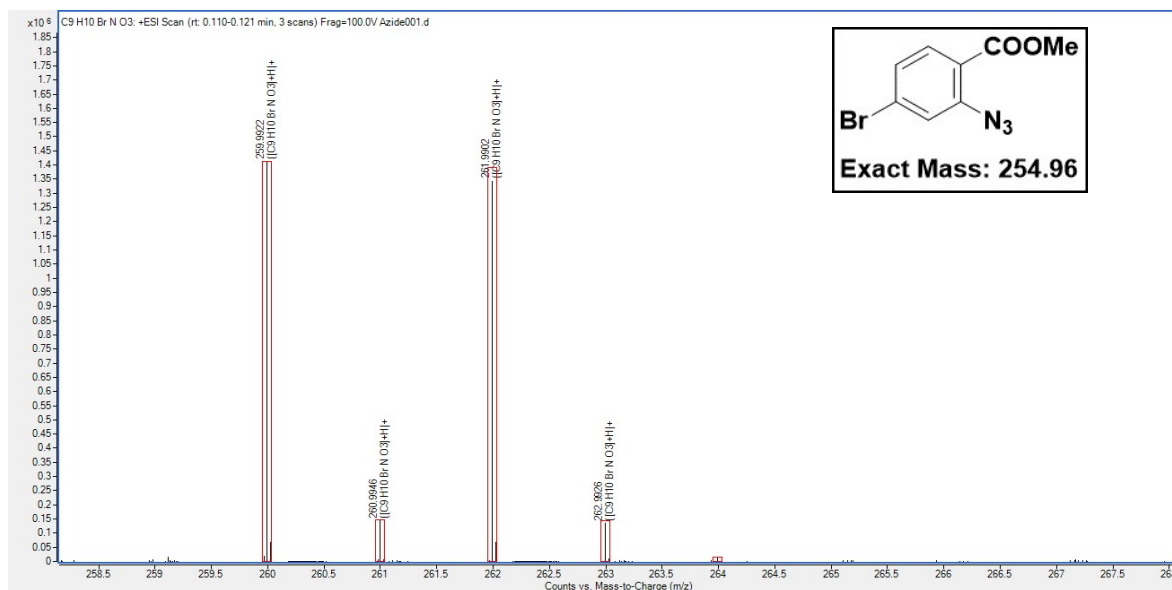

Figure S1 (b): HRMS spectrum of methyl 2-azido-4-bromobenzoate (2)

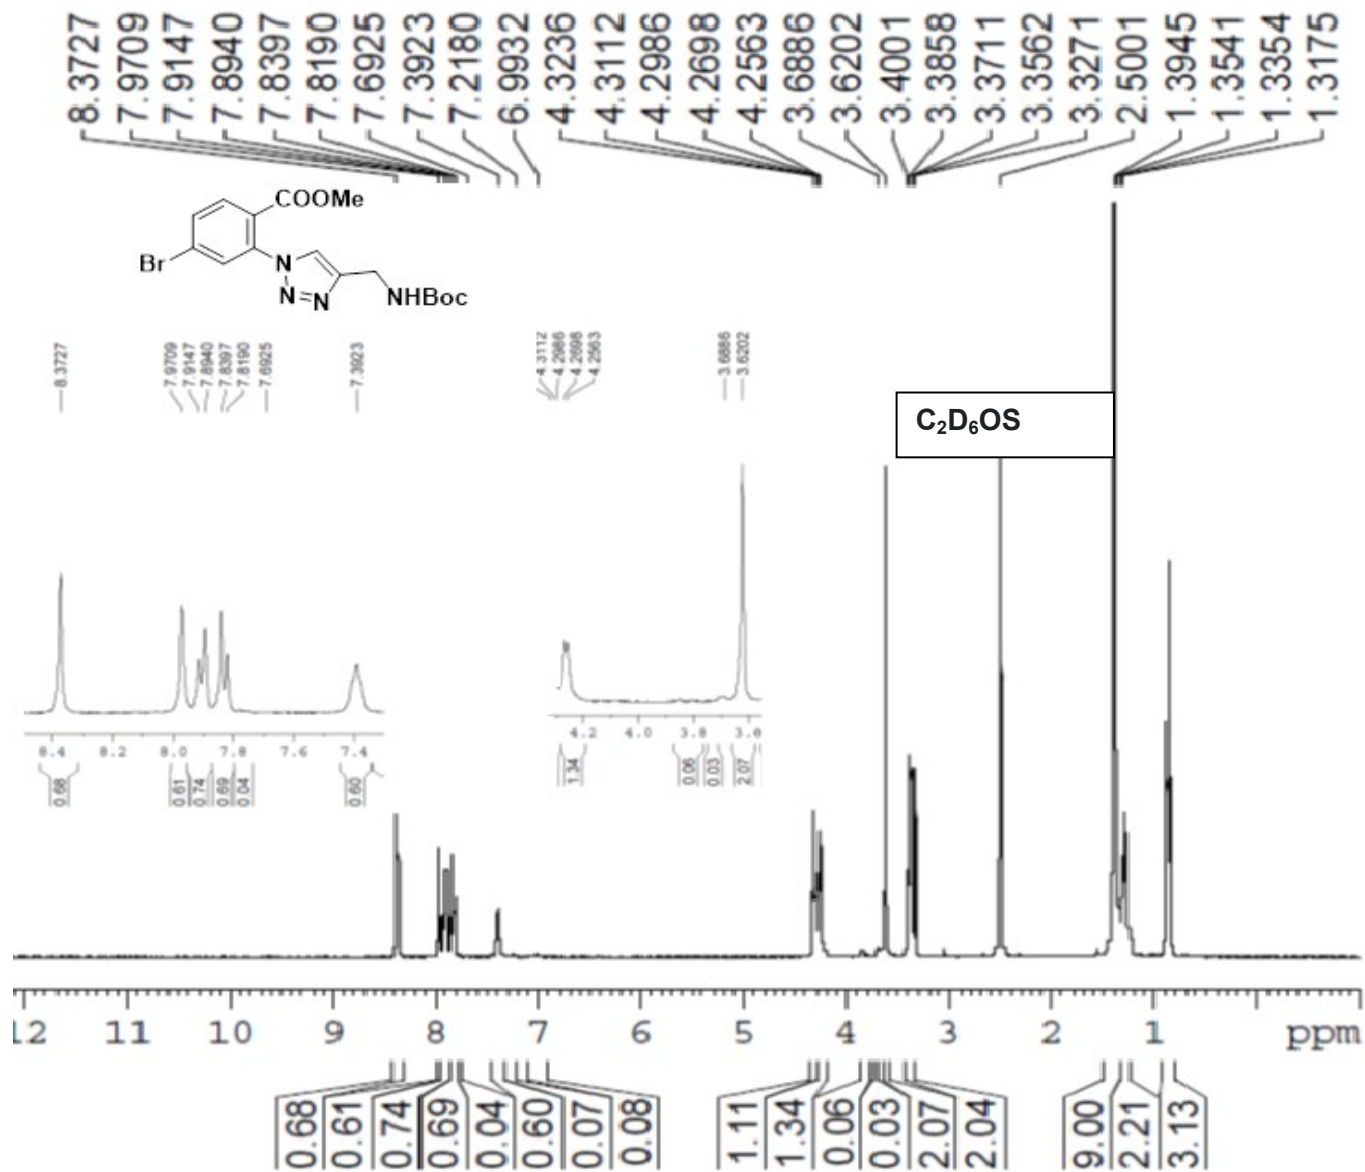

**Figure S2 (a):**  $^1\text{H}$  NMR spectrum of *tert*-butyl(1-(2-(methoxycarbonyl)-5-bromophenyl)-1H-1,2,3-triazol-4-yl)methylcarbamate (**3**)

| Best | ID Source | Formula          | Species                                | m/z               | Score | Diff (ppm) | Score (MFG) |
|------|-----------|------------------|----------------------------------------|-------------------|-------|------------|-------------|
| ⊙    | MFG       | C16 H19 Br N4 O4 | (M+H) <sup>+</sup> (M+Na) <sup>+</sup> | 411.0674 433.0482 | 99.57 | -0.27      | 99.57       |

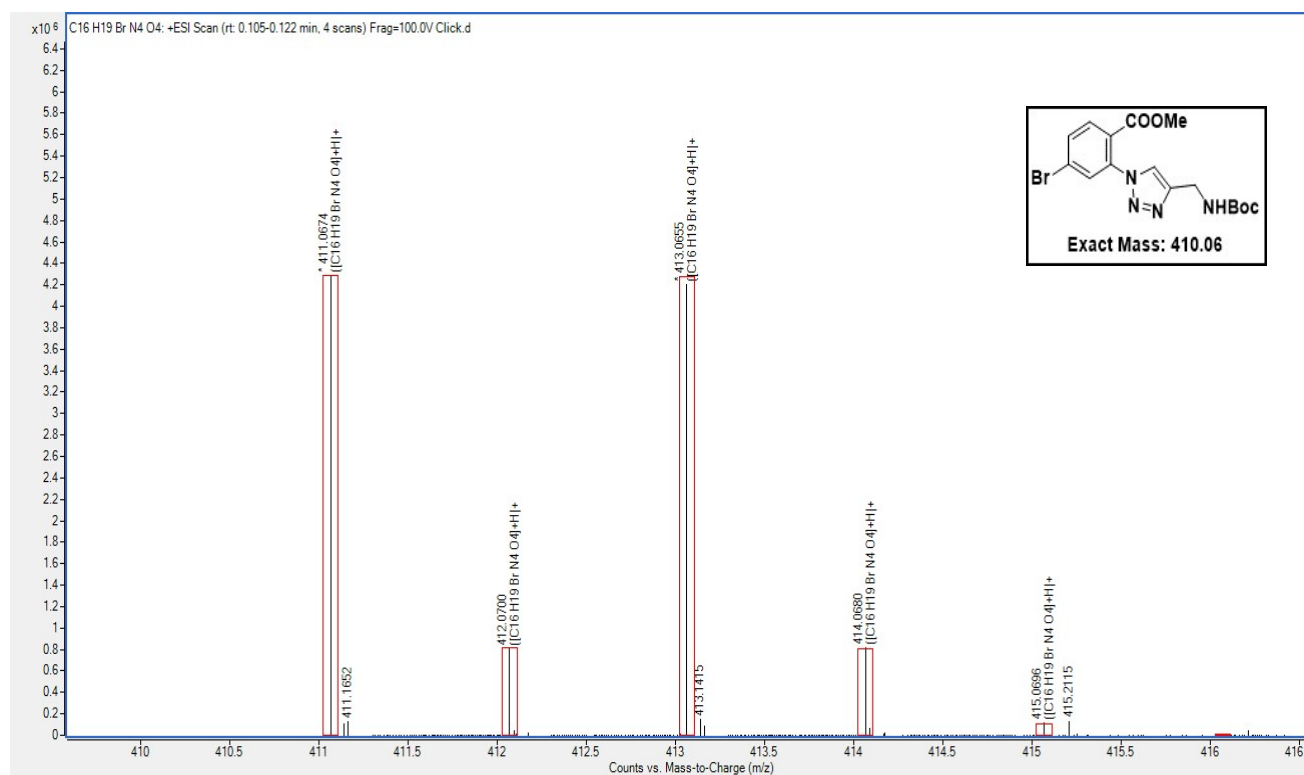

**Figure S2 (b):** HRMS spectrum of *tert*-butyl(1-(2-(methoxycarbonyl)-5-bromophenyl)-1H-1,2,3-triazol-4-yl)methylcarbamate (**3**)

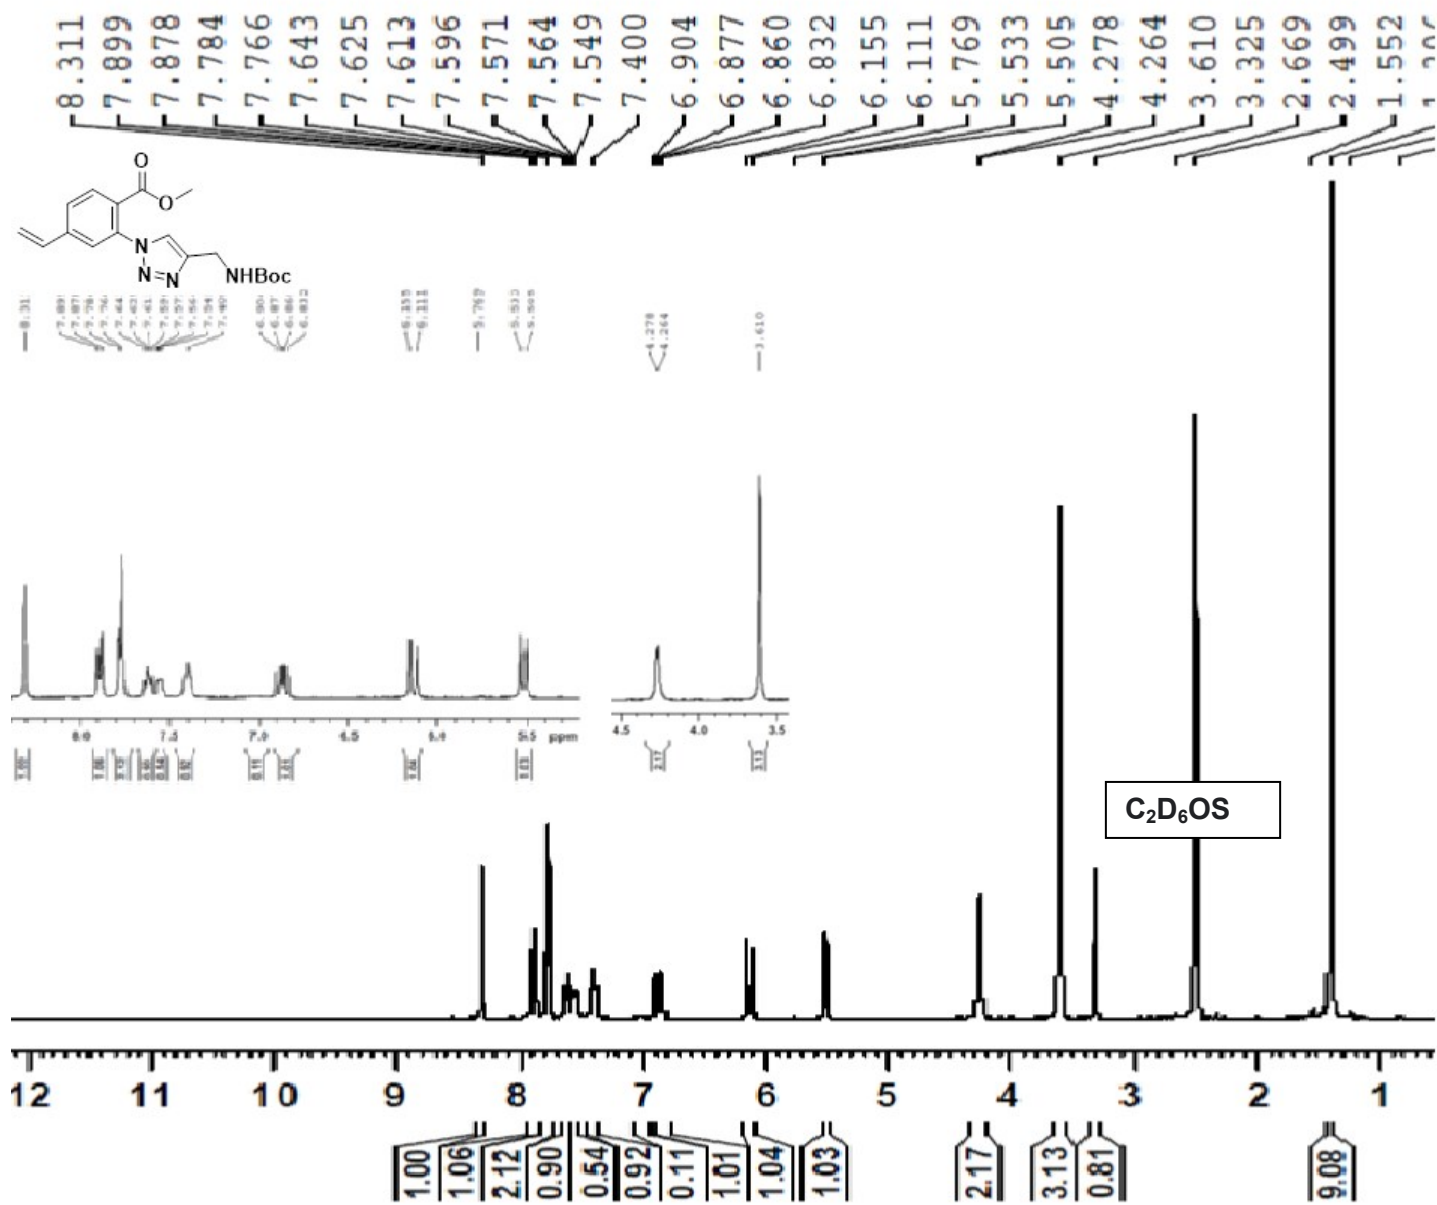

**Figure S3 (a):**  $^1\text{H}$  NMR spectrum of *tert*-butyl (1-(2-(methoxycarbonyl)-5-vinylphenyl)-1H-1,2,3-triazol-4-yl)methylcarbamate (**4**)

| Best | ID Source | Formula                                                       | Species                                | m/z               | Score | Diff (ppm) | Score (MFG) |
|------|-----------|---------------------------------------------------------------|----------------------------------------|-------------------|-------|------------|-------------|
| ⊙    | MFG       | C <sub>18</sub> H <sub>22</sub> N <sub>4</sub> O <sub>4</sub> | (M+H) <sup>+</sup> (M+Na) <sup>+</sup> | 359.1724 381.1531 | 99.07 | -0.6       | 99.07       |

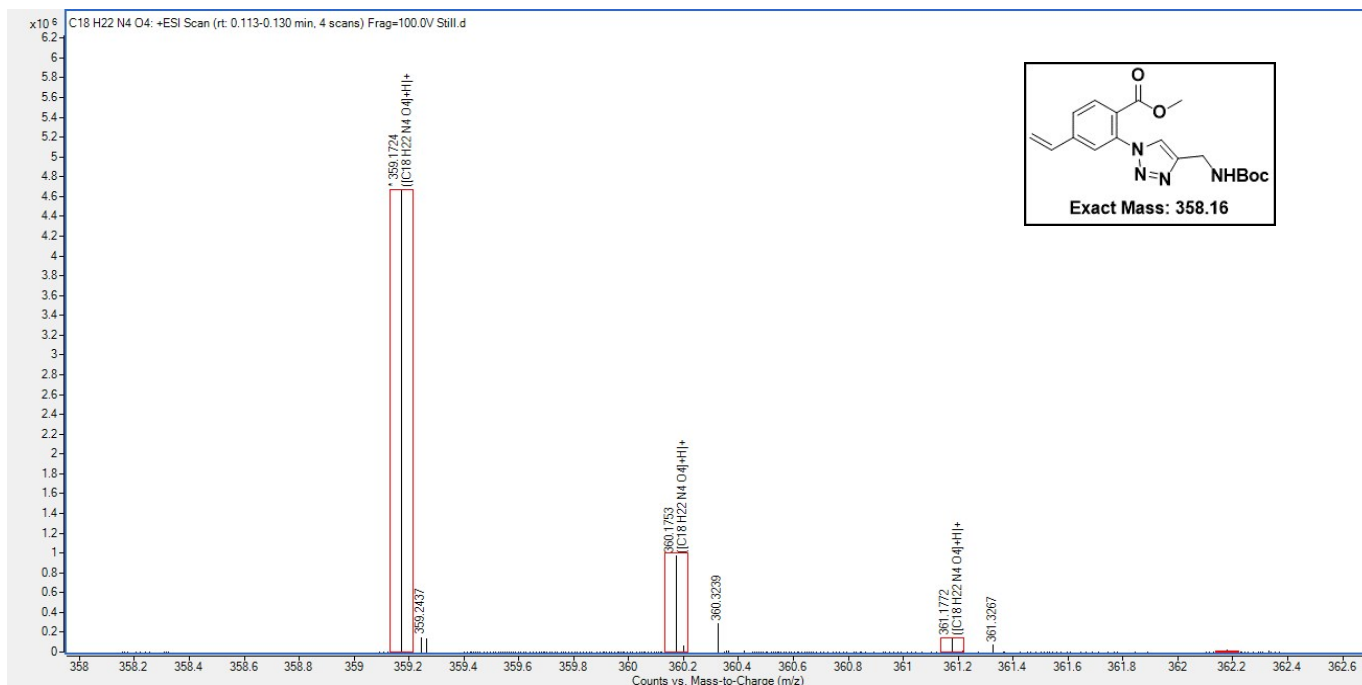

**Figure S3 (b):** HRMS spectrum of *tert*-butyl (1-(2-(methoxycarbonyl)-5-vinylphenyl)-1H-1,2,3-triazol-4-yl)methylcarbamate (**4**)

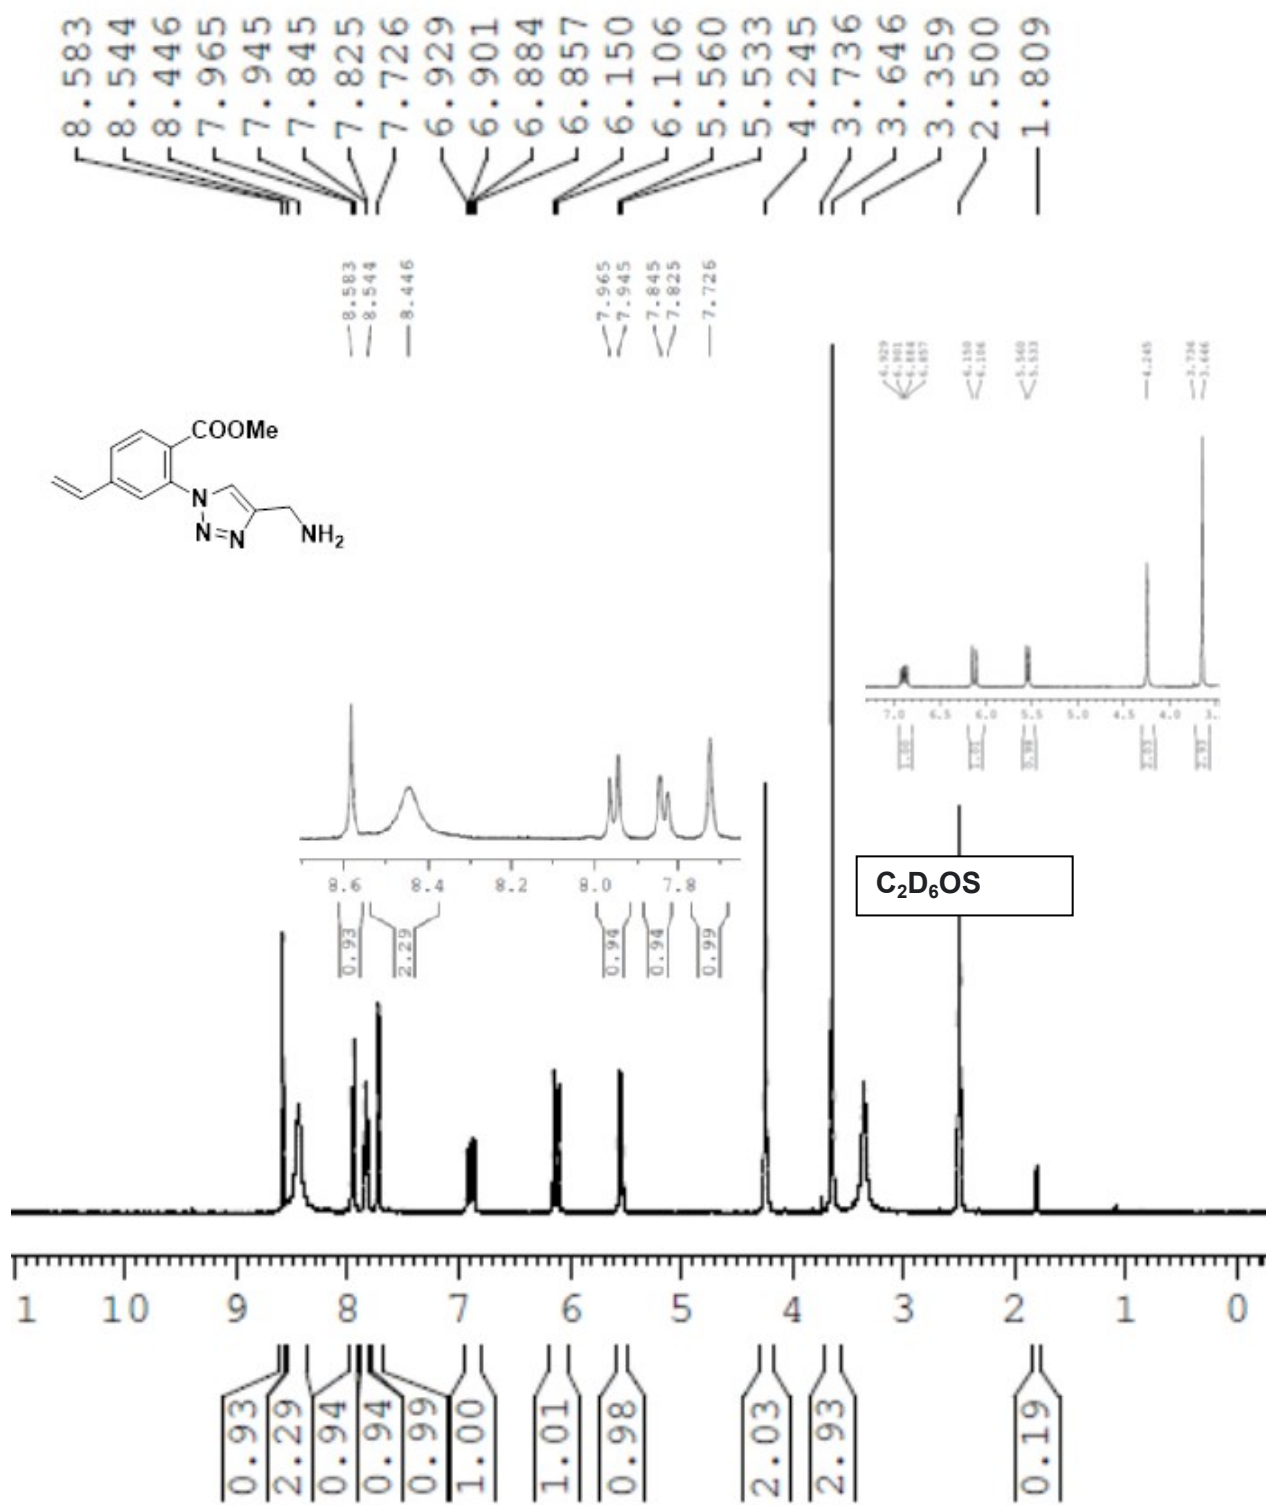

**Figure S4 (a):**  $^1\text{H}$  NMR spectrum of ethyl 2-(4-(aminomethyl)-1H-1,2,3-triazol-1-yl)-4-vinylbenzoate (5)

| Best | ID Source | Formula       | Species                                | m/z               | Score | Diff (ppm) | Score (MFG) |
|------|-----------|---------------|----------------------------------------|-------------------|-------|------------|-------------|
| ⊙    | MFG       | C13 H14 N4 O2 | (M+H) <sup>+</sup> (M+Na) <sup>+</sup> | 259.1202 281.1013 | 98.93 | 1.54       | 98.93       |

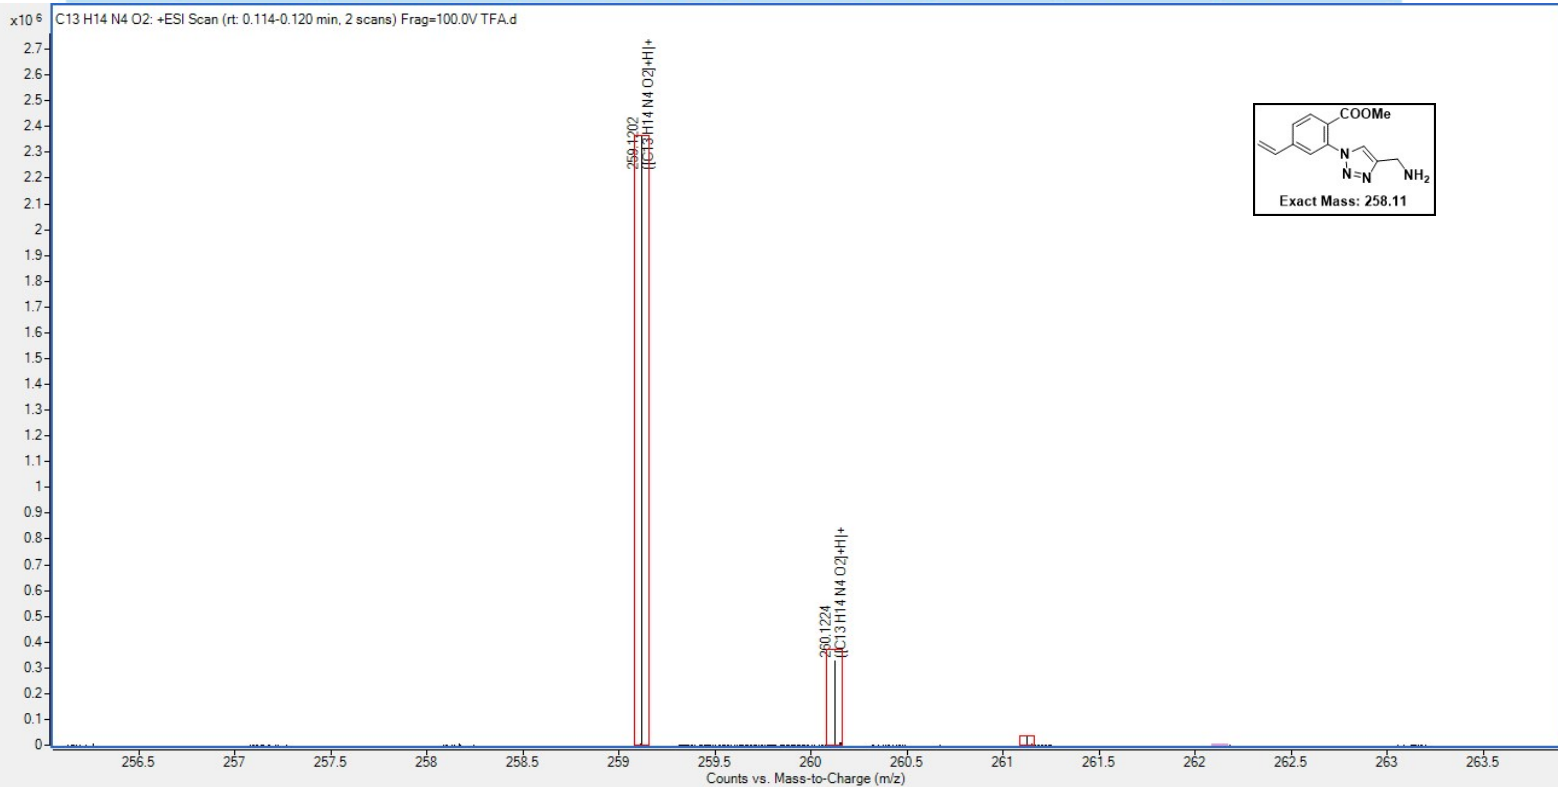

**Figure S 4(b):** HRMS Methyl 2-(4-(aminomethyl)-1H-1,2,3-triazol-1-yl)-4-vinylbenzoate (5)



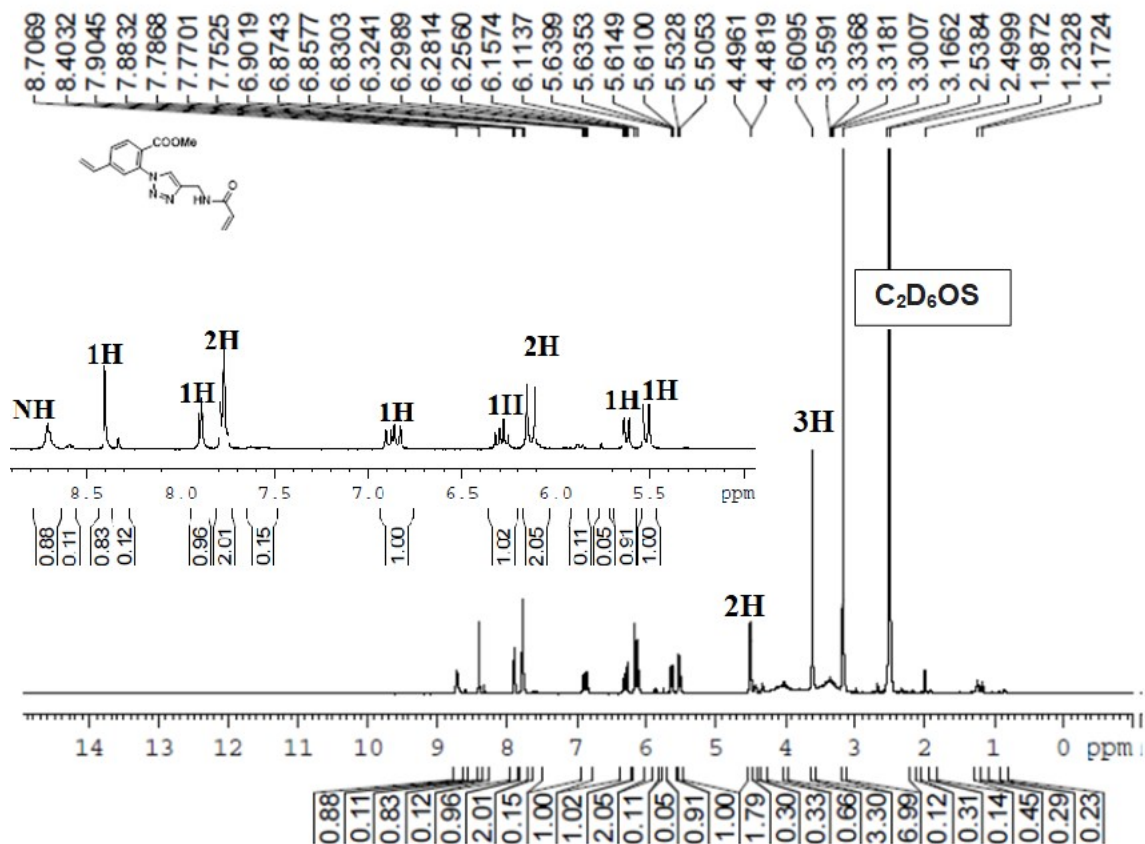

**Figure S5 (a):** <sup>1</sup>H NMR spectrum of methyl 2-(4-((acrylamido)methyl)-1H-1,2,3-triazol-1-yl)-4-vinylbenzoate (6)

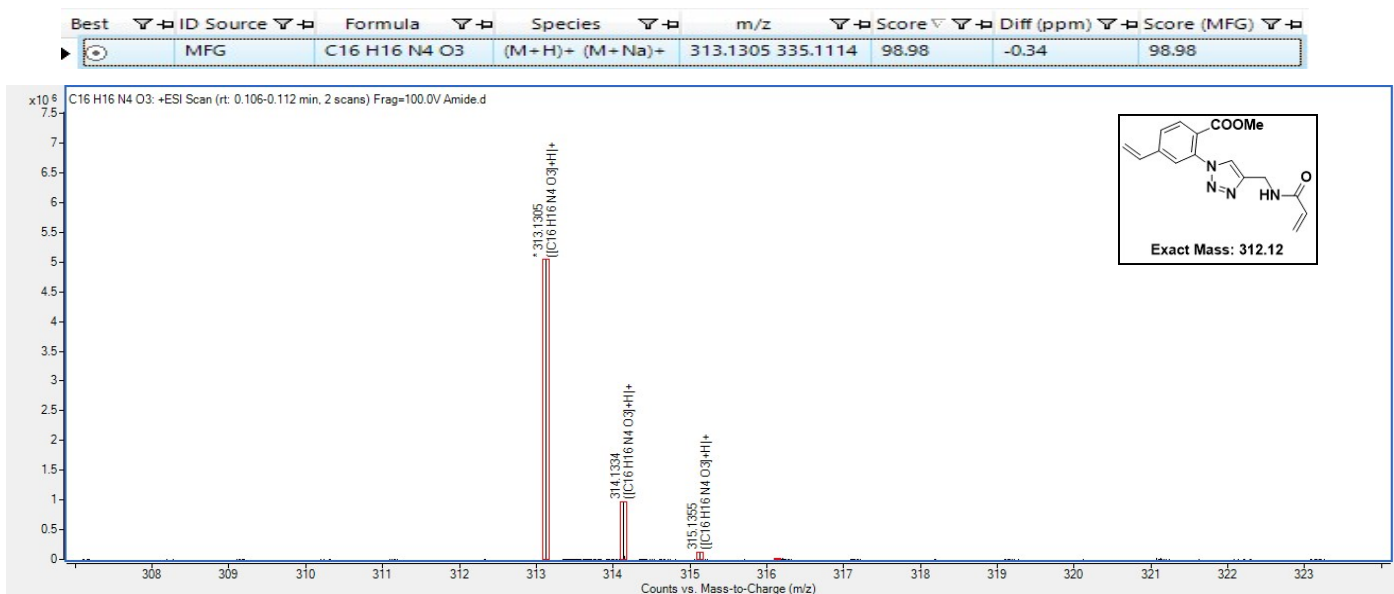

**Figure S5 (b):** HRMS spectrum of methyl 2-(4-((acrylamido)methyl)-1H-1,2,3-triazol-1-yl)-4-vinylbenzoate (6)

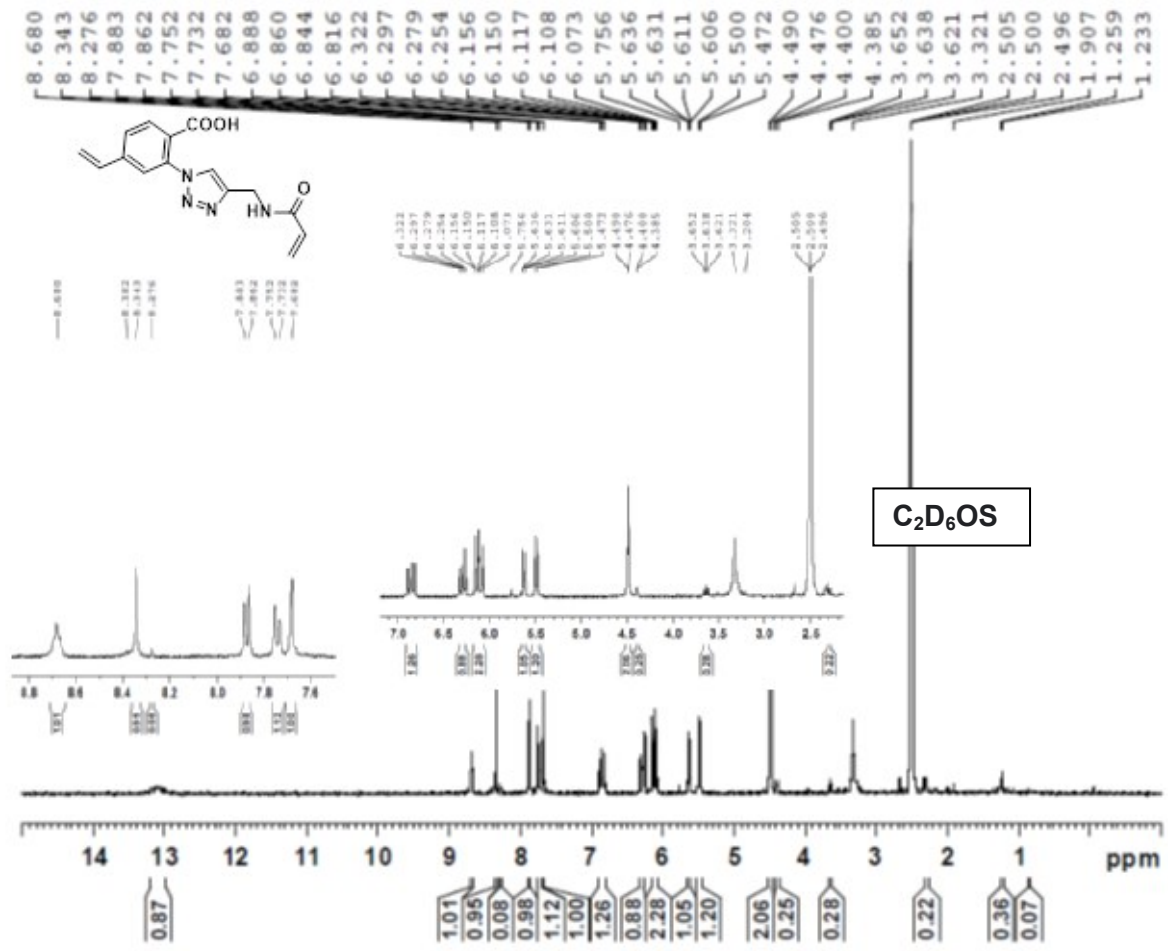

**Figure S6 (a):**  $^1\text{H}$  NMR spectrum of 2-(4-((Acrylamido)methyl)-1H-1,2,3-triazol-1-yl)-4-vinylbenzoic acid (**7**)

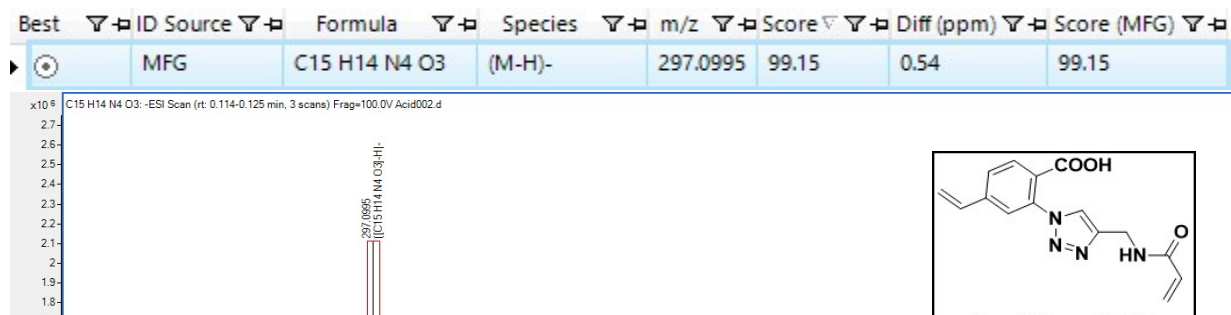

**Figure S6 (b):** HRMS spectrum of 2-(4-((Acrylamido)methyl)-1H-1,2,3-triazol-1-yl)-4-vinylbenzoic acid (7)

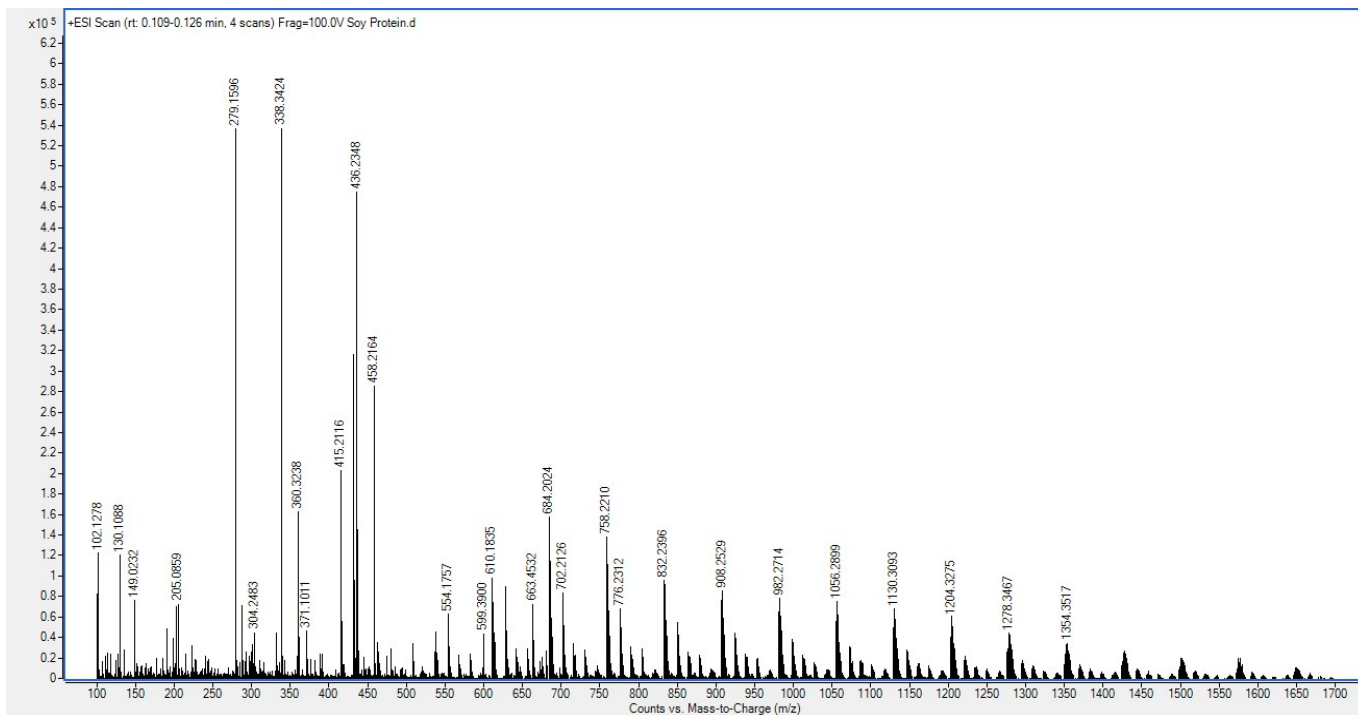

Figure S7(a): HRMS spectrum of Neat SPI

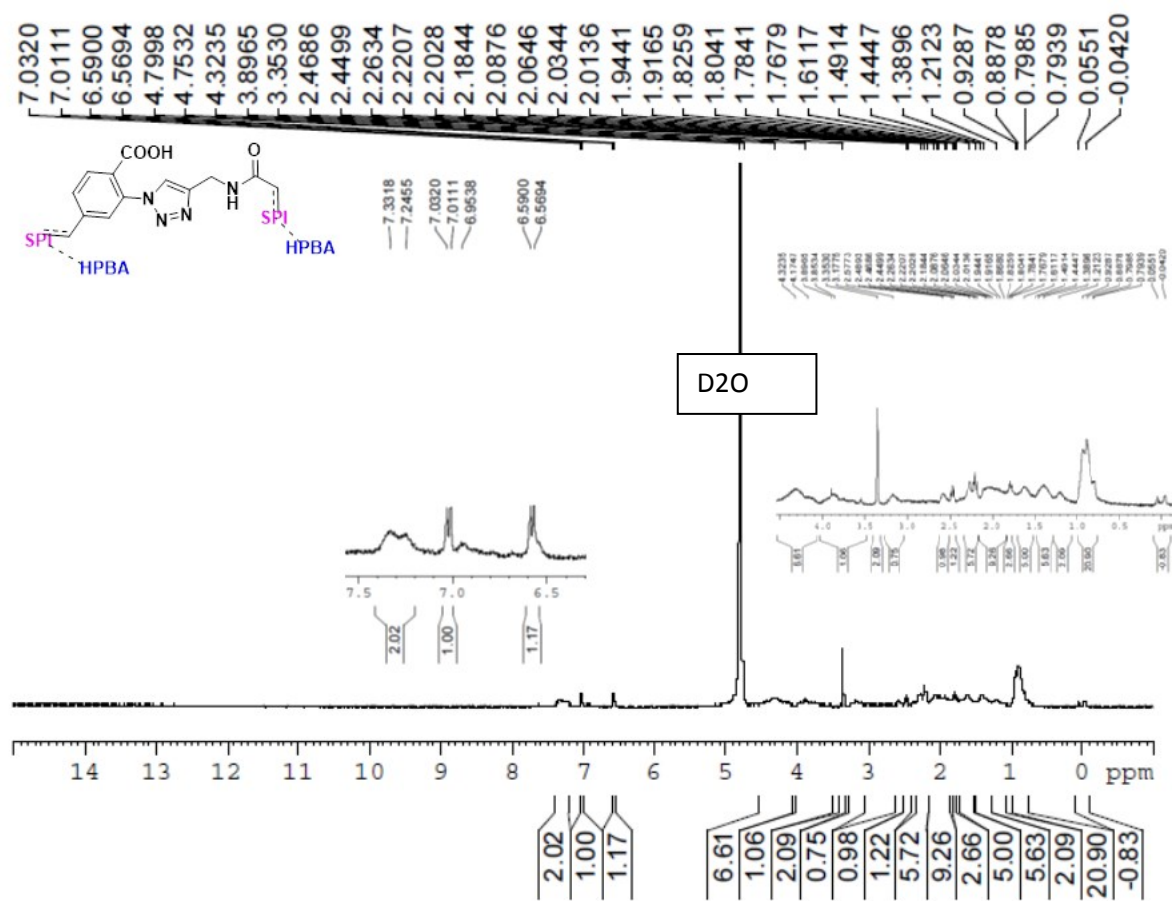

**Figure S8(a):**  $^1\text{H}$  NMR spectrum of Grafted SPI with novel monomer

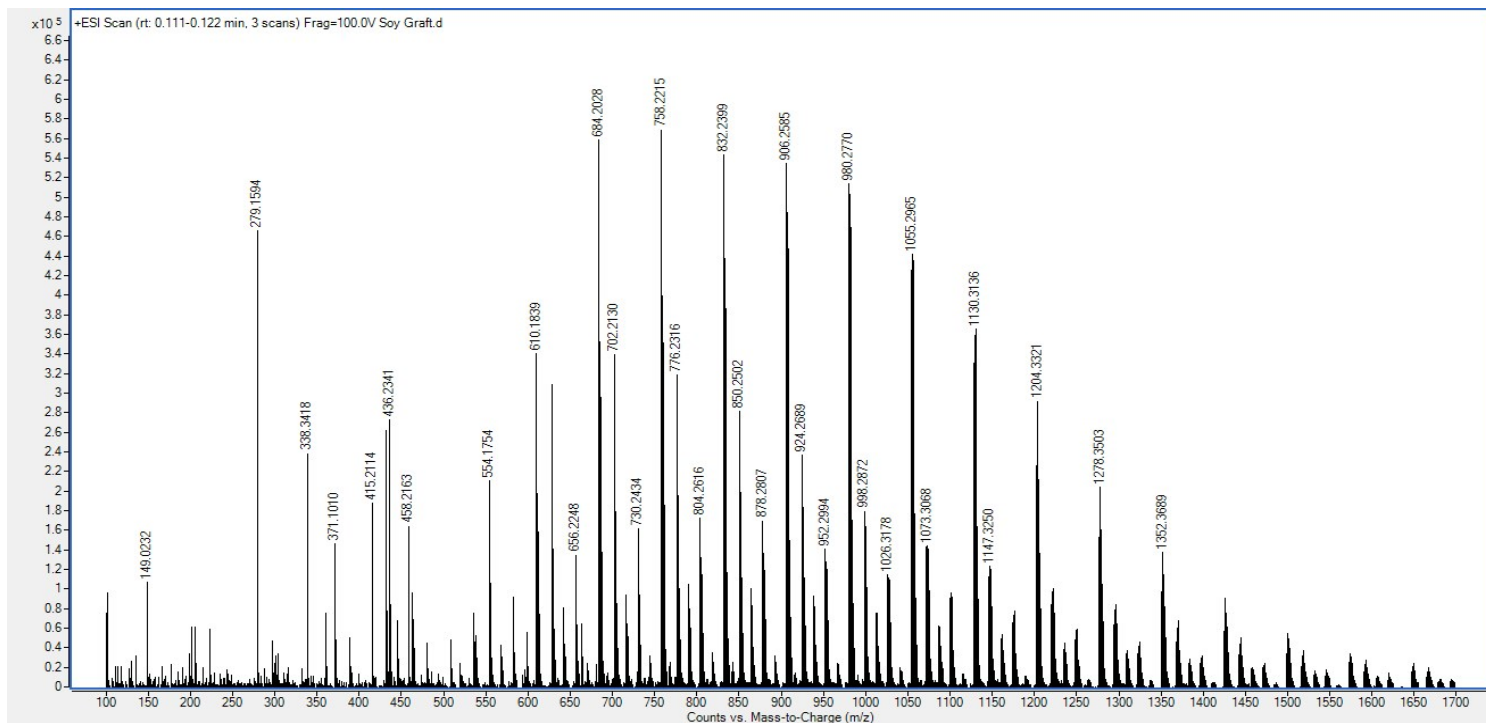

**Figure S8(b):** HRMS spectrum of grafted SPI with novel monomer.
